# Supplementary material for: Clinical Validity of a Machine Learning Decision Support System for Early Detection of Hepatitis B Virus: A Binational External Validation Study
Source: MDPI journal article supplement (doi:10.3390/v15081735), 2023-08-14
Supplement: s1 [file s1]

# Supplementary Table

Laboratory reference intervals for the routine pathology markers

| Pathology markers                          | Abbreviations | SNP-Australian Reference range  |                                 | UITH-Nigerian reference range   |
|--------------------------------------------|---------------|---------------------------------|---------------------------------|---------------------------------|
|                                            |               | Male                            | Female                          | Male/Female                     |
| Alanine aminotransferase                   | ALT           | 5 - 40 U/L                      | 5 - 30 U/L                      | 10 - 49 U/L                     |
| Alkaline phosphatase                       | ALKP          | 35 - 110 U/L                    | 20 - 105 U/L                    | 21 - 105 U/L                    |
| Creatinine                                 | Creat         | 60 - 120 µmol/L                 | 45 – 85 µmol/L                  | 42 – 114 µmol/L                 |
| Total bilirubin                            | TBil          | 4 – 20 µmol/L                   | 3 – 15 µmol/L                   | 3 – 25 µmol/L                   |
| Gamma glutamyl transferase                 | GGT           | 5 - 50 U/L                      | 5 - 35 U/L                      | 7 - 50 U/L                      |
| Albumin                                    | ALB           | 34 - 50 g/L                     | 34 - 50 g/L                     | 35 - 50 g/L                     |
| Haemoglobin                                | Hb            | 125 - 175 g/L                   | 110 - 165 g/L                   | 130 - 175 g/L                   |
| Haematocrit                                | Hct           | 0.38 - 0.54 L/L                 | 0.34 - 0.47 L/L                 | 0.39 - 0.48 L/L                 |
| White blood count                          | WBC           | 3.5 – 11.0 x 10 <sup>9</sup> /L | 3.5 – 11.0 x 10 <sup>9</sup> /L | 2.5 – 10.0 x 10 <sup>9</sup> /L |
| Platelet                                   | PLT           | 150 – 400 x 10 <sup>9</sup> /L  | 150 – 400 x 10 <sup>9</sup> /L  | 150 – 450 x 10 <sup>9</sup> /L  |
| Mean corpuscular haemoglobin concentration | MCHC          | 310 – 360 g/L                   | 310 – 360 g/L                   | 320 – 365 g/L                   |
| Mean corpuscular haemoglobin               | MCH           | 27.5 - 34 pg/RBC                | 27.5 - 34 pg/RBC                | 27 - 34 pg/RBC                  |
| Mean corpuscular volume                    | MCV           | 80 - 100 fL                     | 80 - 100 fL                     | 80 - 100 fL                     |
| Red blood cell                             | RBC           | 4.2 - 6.5 x 10 <sup>12</sup> /L | 3.7 - 5.6 x 10 <sup>12</sup> /L | 3.9 - 5.6 x 10 <sup>12</sup> /L |
| Red cell distribution width                | RDW           | 11-16%                          | 11-16%                          | 11-15%                          |
| Neutrophils                                | Neut          | 40 – 75%                        | 40 – 75%                        | 40 – 75%                        |
| Lymphocytes                                | Lymph         | 18 – 45%                        | 18 – 45%                        | 20 – 45%                        |
| Aspartate aminotransferase                 | AST           | 10 – 40%                        | 10 – 35 U/L                     | 10 - 46 U/L                     |
